# Supplementary material for: Photocatalytic properties of polydopamine-modified Ag NP/TiO2 porous nanofibers prepared by electrospinning
Source: Royal Society of Chemistry journal article supplement (doi:10.1039/c5ra16797c), 2015-01-01
Supplement: c5ra16797c1.pdf [file c5ra16797c1.pdf]

## Supporting Information

### 1. BET data

| Samples                        | S <sub>BET</sub> (m <sup>2</sup> g <sup>-1</sup> ) | Pore volume(cm <sup>3</sup> /g) | Pore size(nm) |
|--------------------------------|----------------------------------------------------|---------------------------------|---------------|
| Pure TiO <sub>2</sub>          | 29.9168±0.1264                                     | 0.072445                        | 9.64239       |
| Porous TiO <sub>2</sub>        | 39.4776±0.1735                                     | 0.094703                        | 10.43119      |
| Porous Ag/TiO <sub>2</sub>     | 32.2148±0.1633                                     | 0.084614                        | 10.23211      |
| Porous PDA-Ag/TiO <sub>2</sub> | 35.4392±0.1748                                     | 0.090017                        | 10.33874      |

### 2. The original data of the MO degradation (the absorbance of the reaction solution analyzed with a UV-vis-NIR scanning spectrophotometer at 554 nm).

| Catalyst<br>Time(min) | Without<br>catalyst | Pure<br>TiO <sub>2</sub> | Porous<br>TiO <sub>2</sub> | Porous<br>Ag/TiO <sub>2</sub> | Porous PDA-<br>Ag/TiO <sub>2</sub> |
|-----------------------|---------------------|--------------------------|----------------------------|-------------------------------|------------------------------------|
| -30                   | 1.498               | 1.498                    | 1.498                      | 1.498                         | 1.498                              |
| 0                     | 1.498               | 1.467                    | 1.363                      | 1.393                         | 1.183                              |
| 10                    | 1.497               | 1.197                    | 1.077                      | 0.915                         | 0.491                              |
| 20                    | 1.492               | 0.881                    | 0.725                      | 0.500                         | 0.211                              |
| 30                    | 1.486               | 0.713                    | 0.433                      | 0.276                         | 0.163                              |
| 40                    | 1.482               | 0.560                    | 0.247                      | 0.166                         | 0.129                              |
| 50                    | 1.479               | 0.431                    | 0.171                      | 0.148                         | 0.103                              |
| 60                    | 1.476               | 0.298                    | 0.141                      | 0.129                         | 0.082                              |
